# Supplementary material
Source: Royal Society of Chemistry journal article supplement (doi:10.1039/d6cp00677a)
Supplement: d6cp00677a1.pdf [file d6cp00677a1.pdf]

## Supporting Information:

### **Graph Neural Network Architectures for Predicting the Electrophilicity Index: Insights from 2D and 3D Molecular Graph Representations**

Sandeep Kumar<sup>\*1, a)</sup> and Annika Bande<sup>1, 2, b)</sup>

<sup>1)</sup>*Helmholtz-Zentrum Berlin für Materialien und Energie GmbH,  
Hahn-Meitner-Platz 1, 14109 Berlin, Germany*

<sup>2)</sup>*Leibniz University Hannover, Institute of Inorganic Chemistry, Callinstr. 9,  
30167 Hannover, Germany*

---

<sup>a)</sup>Electronic mail: sandeep.kumar@helmholtz-berlin.de

<sup>b)</sup>Electronic mail: annika.bande@helmholtz-berlin.de

## TABLE OF CONTENTS

|                                                                                                                                                                                                                                                                                                                                                                   | Page |
|-------------------------------------------------------------------------------------------------------------------------------------------------------------------------------------------------------------------------------------------------------------------------------------------------------------------------------------------------------------------|------|
| <b>FIG. S1.</b> (a) shows the frequency of atom types across molecules, (b) represents the Spearman rank correlation of their ranked $\omega$ values.                                                                                                                                                                                                             | S3   |
| <b>Table S1.</b> Hyperparameters of 2D GNN models for $\omega$ index prediction.                                                                                                                                                                                                                                                                                  | S3   |
| <b>Table S2.</b> Hyperparameters of 3D GNN models for $\omega$ index prediction.                                                                                                                                                                                                                                                                                  | S4   |
| <b>Table S3.</b> Performance metrics of 2D GNN models for $\omega$ prediction using single train/test split and 5-fold cross-validation (log-transformed $\omega$ ).                                                                                                                                                                                              | S4   |
| <b>Table S4.</b> Performance metrics of ALIGNN, GemNet, and SchNet for $\omega$ prediction using single train/test split and 5-fold cross-validation (log-transformed $\omega$ ).                                                                                                                                                                                 | S5   |
| <b>FIG. S2.</b> Predicted vs. actual and residuals vs. actual of $\omega$ (log-transformed $\omega$ ) for GINE, GIN, and GATv2 models (top to bottom).                                                                                                                                                                                                            | S6   |
| <b>FIG. S3.</b> Predicted vs. actual and residuals vs. actual of $\omega$ (log-transformed $\omega$ ) for AFP, GCN, and GraphSAGE models (top to bottom).                                                                                                                                                                                                         | S7   |
| <b>FIG. S4.</b> 5-fold cross-validation $R^2$ scores for 2D and 3D molecular graph models predicting the electrophilicity index ( $\omega$ ). (a) 2D models trained on log-transformed $\omega$ . (b) 2D models trained on the original $\omega$ scale. (c) 3D models trained on log-transformed $\omega$ . (d) 3D models trained on the original $\omega$ scale. | S8   |
| <b>FIG. S5.</b> Predicted vs. actual and residuals vs. actual of $\omega$ (log-transformed $\omega$ ) for GemNet, SchNet, and ALIGNN models (top to bottom).                                                                                                                                                                                                      | S9   |
| <b>Section S1.</b> Evaluation Metrics for Electrophilicity Index ( $\omega$ ) Prediction                                                                                                                                                                                                                                                                          | S9   |
| <b>FIG. S6.</b> Distribution of the electrophilicity index ( $\omega$ ) across representative functional groups. Boxes denote the interquartile range (IQR), the central line indicates the median, whiskers show the data range, and outliers are plotted as individual points. White markers represent the mean value for each group.                           | S11  |

FIG. S1: (a) shows the frequency of atom types across molecules, (b) represents the Spearman rank correlation between the ranked values of the original  $\omega$  scale and logarithmically transformed  $\omega$  values.

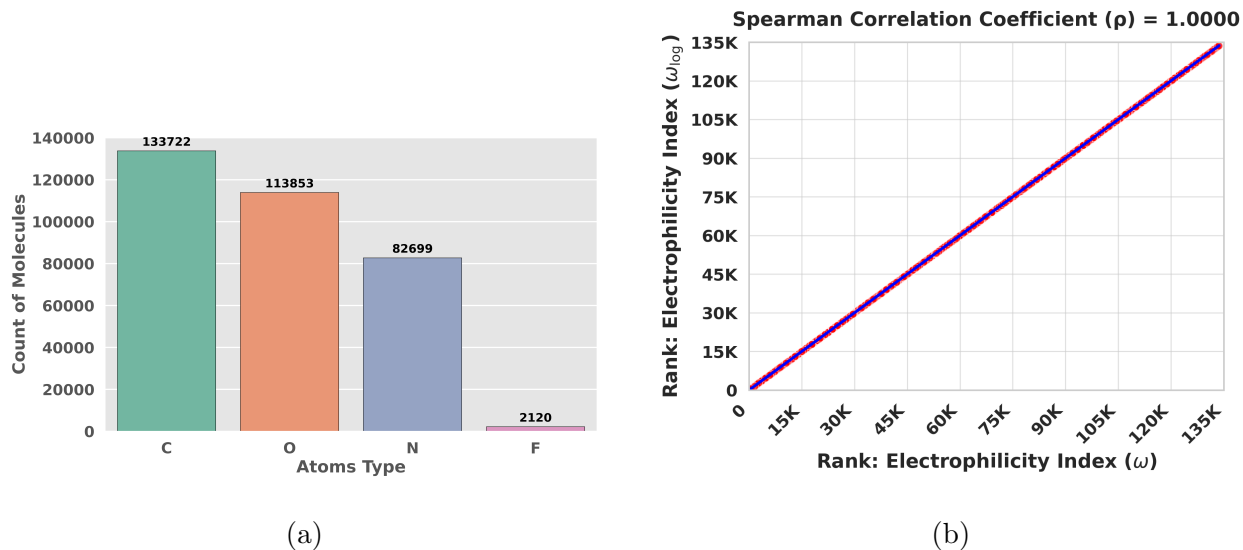

TABLE S1: Hyperparameters of 2D GNN models for  $\omega$  prediction.

| Hyperparameter   | GINE                 | GIN                  | GATv2                 | GraphSAGE            | AFP                  | GCN                  |
|------------------|----------------------|----------------------|-----------------------|----------------------|----------------------|----------------------|
| Epochs           | 240                  | 300                  | 120                   | 240                  | 300                  | 180                  |
| Batch size       | 32                   | 128                  | 32                    | 32                   | 128                  | 64                   |
| Learning rate    | $1.0 \times 10^{-5}$ | $1.0 \times 10^{-3}$ | $4.4 \times 10^{-5}$  | $4.4 \times 10^{-5}$ | $1.0 \times 10^{-3}$ | $1.0 \times 10^{-3}$ |
| Weight decay     | $1.0 \times 10^{-5}$ | $1.0 \times 10^{-6}$ | $4.86 \times 10^{-6}$ | $5.0 \times 10^{-6}$ | $1.0 \times 10^{-5}$ | $1.0 \times 10^{-6}$ |
| Number of layers | –                    | 6                    | 6                     | 4                    | 5                    | 4                    |
| Hidden channels  | 256                  | 192                  | 256                   | 256                  | 256                  | 224                  |
| Dropout          | 0.1                  | 0.1                  | 0.2                   | 0.2                  | 0.0                  | 0.0                  |

TABLE S2: Hyperparameters of 3D GNN models for  $\omega$  prediction.

| Hyperparameter    | GemNet                | SchNet                 | ALIGNN               |
|-------------------|-----------------------|------------------------|----------------------|
| Epochs            | 163                   | 105                    | 300                  |
| Batch size        | 32                    | 32                     | 8                    |
| Learning rate     | $1.20 \times 10^{-4}$ | $7.13 \times 10^{-4}$  | $1.0 \times 10^{-3}$ |
| Weight decay      | $1.84 \times 10^{-6}$ | $1.57 \times 10^{-6}$  | $1.0 \times 10^{-5}$ |
| Number of layers  | 4                     | 5 (interaction blocks) | 4                    |
| Hidden channels   | 256                   | 64                     | 256                  |
| Number of filters | –                     | 256                    | –                    |

TABLE S3: Performance metrics of GNN models for  $\omega$  prediction (log-transformed  $\omega$ ) using single train/test split and 5-fold cross-validation, ordered best to worst by CV RMSE.

| Metric                                                     | GINE                | AFP                 | GIN                 | GATv2               | GraphSAGE           | GCN                 |
|------------------------------------------------------------|---------------------|---------------------|---------------------|---------------------|---------------------|---------------------|
| <i>Train/Test Split</i>                                    |                     |                     |                     |                     |                     |                     |
| Epochs                                                     | 214                 | 70                  | 135                 | 215                 | 300                 | 180                 |
| Train MAE                                                  | 0.0470              | 0.0578              | 0.0516              | 0.0620              | 0.0635              | 0.0752              |
| Test MAE                                                   | 0.0524              | 0.0595              | 0.0586              | 0.0648              | 0.0662              | 0.0774              |
| Train RMSE                                                 | 0.0660              | 0.0836              | 0.0713              | 0.0883              | 0.0904              | 0.1049              |
| Test RMSE                                                  | 0.0774              | 0.0845              | 0.0832              | 0.0909              | 0.0924              | 0.1062              |
| Train R <sup>2</sup>                                       | 0.9893              | 0.9830              | 0.9876              | 0.9810              | 0.9801              | 0.9733              |
| Test R <sup>2</sup>                                        | 0.9857              | 0.9827              | 0.9832              | 0.9800              | 0.9793              | 0.9726              |
| Train MSE                                                  | 0.0044              | 0.0070              | 0.0051              | 0.0078              | 0.0082              | 0.0110              |
| Test MSE                                                   | 0.0060              | 0.0071              | 0.0069              | 0.0083              | 0.0085              | 0.0113              |
| <i>5-Fold Cross-Validation (mean <math>\pm</math> std)</i> |                     |                     |                     |                     |                     |                     |
| MAE                                                        | 0.0591 $\pm$ 0.0060 | 0.0620 $\pm$ 0.0020 | 0.0704 $\pm$ 0.0038 | 0.0753 $\pm$ 0.0028 | 0.0773 $\pm$ 0.0017 | 0.0856 $\pm$ 0.0050 |
| RMSE                                                       | 0.0844 $\pm$ 0.0062 | 0.0904 $\pm$ 0.0028 | 0.0993 $\pm$ 0.0043 | 0.1057 $\pm$ 0.0041 | 0.1076 $\pm$ 0.0035 | 0.1178 $\pm$ 0.0049 |
| R <sup>2</sup>                                             | 0.9826 $\pm$ 0.0027 | 0.9801 $\pm$ 0.0012 | 0.9760 $\pm$ 0.0020 | 0.9728 $\pm$ 0.0021 | 0.9718 $\pm$ 0.0018 | 0.9662 $\pm$ 0.0029 |
| MSE                                                        | 0.0072 $\pm$ 0.0011 | 0.0082 $\pm$ 0.0005 | 0.0099 $\pm$ 0.0009 | 0.0112 $\pm$ 0.0009 | 0.0116 $\pm$ 0.0008 | 0.0139 $\pm$ 0.0012 |

TABLE S4: Performance metrics of ALIGNN, GemNet, and SchNet for  $\omega$  prediction using single train/test split and 5-fold cross-validation (log-transformed  $\omega$ ), ordered best to worst by CV RMSE.

| <b>Metric</b>                                                                                   | <b>ALIGNN</b>       | <b>GemNet</b>       | <b>SchNet</b>       |
|-------------------------------------------------------------------------------------------------|---------------------|---------------------|---------------------|
| <i>Train/Test Split (log-transformed <math>\omega</math>)</i>                                   |                     |                     |                     |
| Train MAE                                                                                       | 0.0222              | 0.0265              | 0.0329              |
| Test MAE                                                                                        | 0.0286              | 0.0360              | 0.0374              |
| Train RMSE                                                                                      | 0.0292              | 0.0352              | 0.0433              |
| Test RMSE                                                                                       | 0.0412              | 0.0531              | 0.0532              |
| Train R <sup>2</sup>                                                                            | 0.9979              | 0.9970              | 0.9954              |
| Test R <sup>2</sup>                                                                             | 0.9963              | 0.9932              | 0.9931              |
| <i>5-Fold Cross-Validation (mean <math>\pm</math> std, log-transformed <math>\omega</math>)</i> |                     |                     |                     |
| MAE                                                                                             | 0.0313 $\pm$ 0.0051 | 0.0403 $\pm$ 0.0016 | 0.0493 $\pm$ 0.0070 |
| RMSE                                                                                            | 0.0457 $\pm$ 0.0035 | 0.0595 $\pm$ 0.0019 | 0.0670 $\pm$ 0.0073 |
| R <sup>2</sup>                                                                                  | 0.9949 $\pm$ 0.0007 | 0.9914 $\pm$ 0.0005 | 0.9890 $\pm$ 0.0024 |

FIG. S2: Predicted vs. actual and residuals vs. actual of  $\omega$  (log-transformed  $\omega$ ) for GINE, AFP, and GIN models (top to bottom).

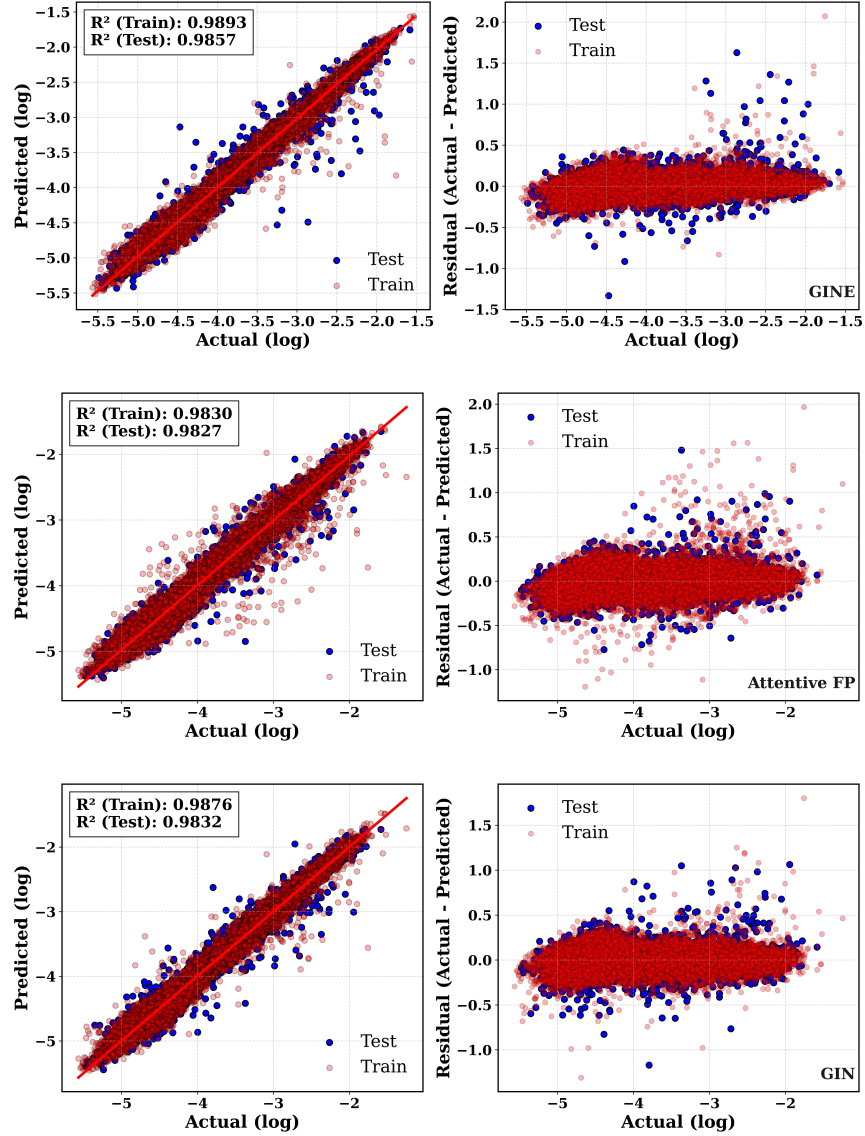

FIG. S3: Predicted vs. actual and residuals vs. actual of  $\omega$  (log-transformed  $\omega$ ) for GATv2, GraphSAGE, and GCN models (top to bottom).

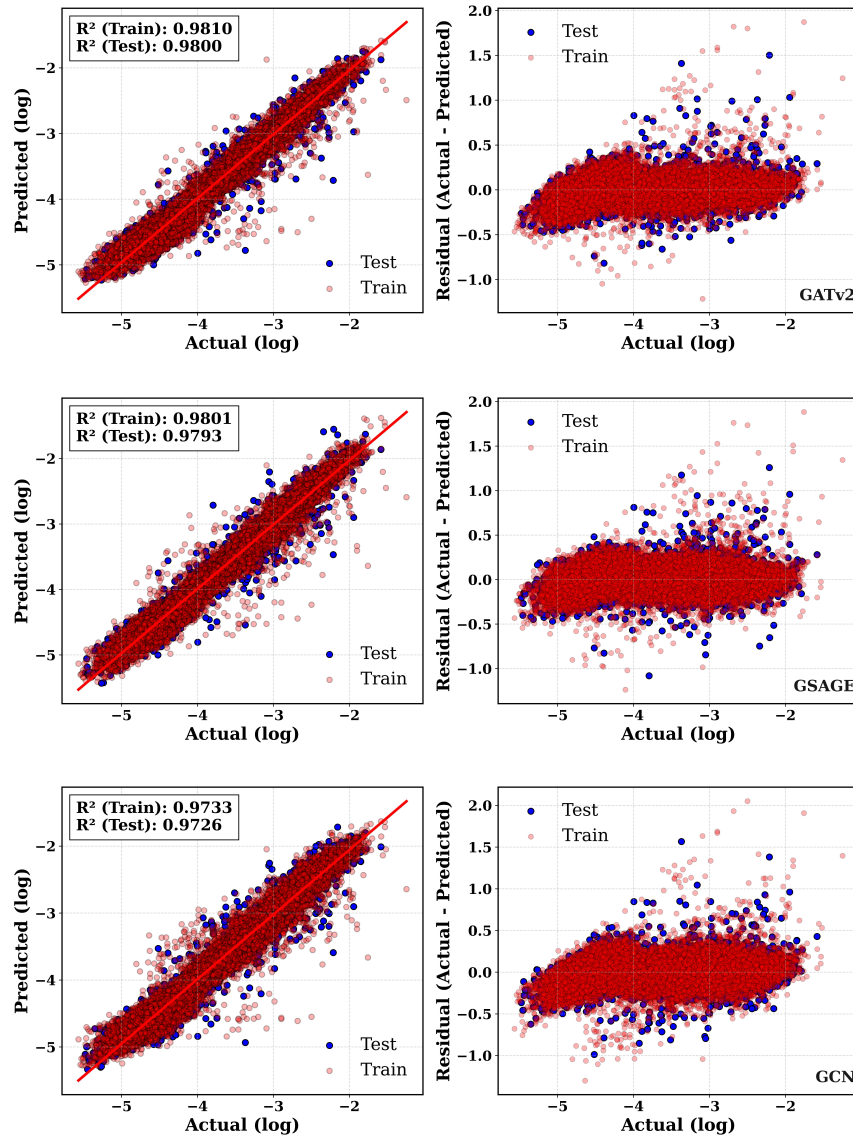

FIG. S4: 5-fold cross-validation  $R^2$  scores for 2D and 3D molecular graph models predicting  $\omega$ . (a) 2D models on log-transformed  $\omega$ . (b) 2D models on the original  $\omega$  scale. (c) 3D models on log-transformed  $\omega$ . (d) 3D models on the original  $\omega$  scale.

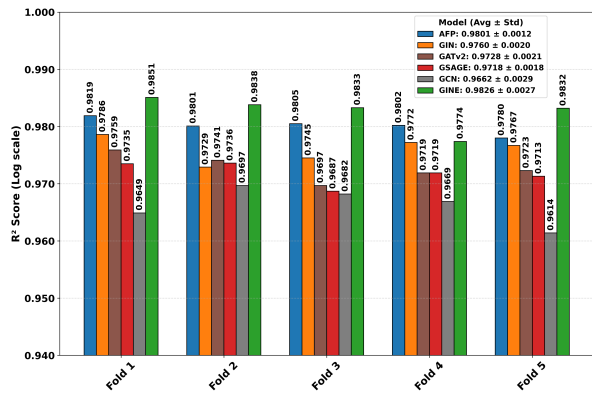

(a)

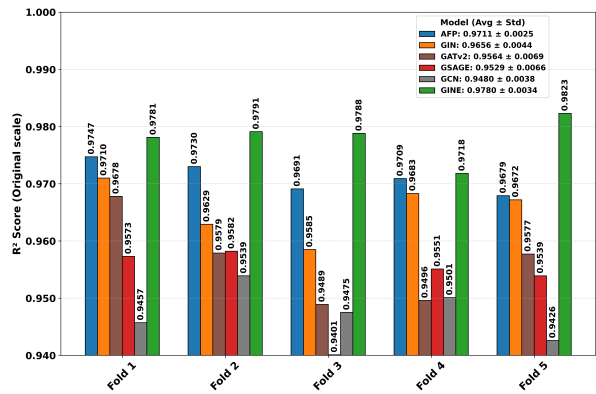

(b)

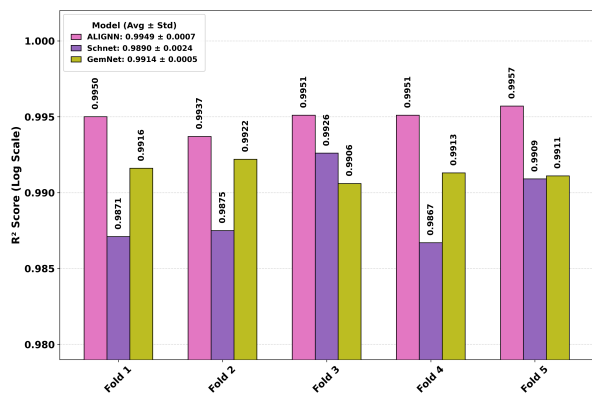

(c)

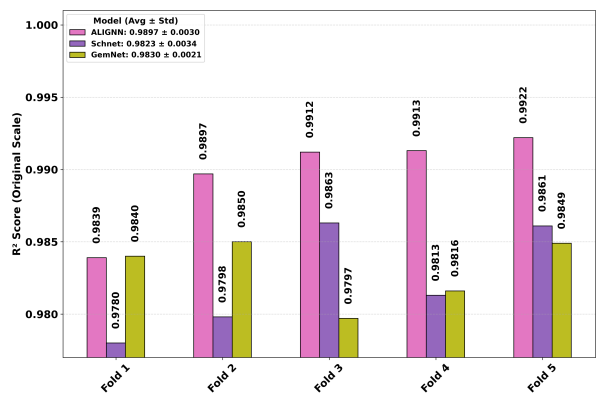

(d)

FIG. S5: Predicted vs. actual and residuals vs. actual of  $\omega$  (log-transformed  $\omega$ ) for GemNet, SchNet, and ALIGNN models (top to bottom).

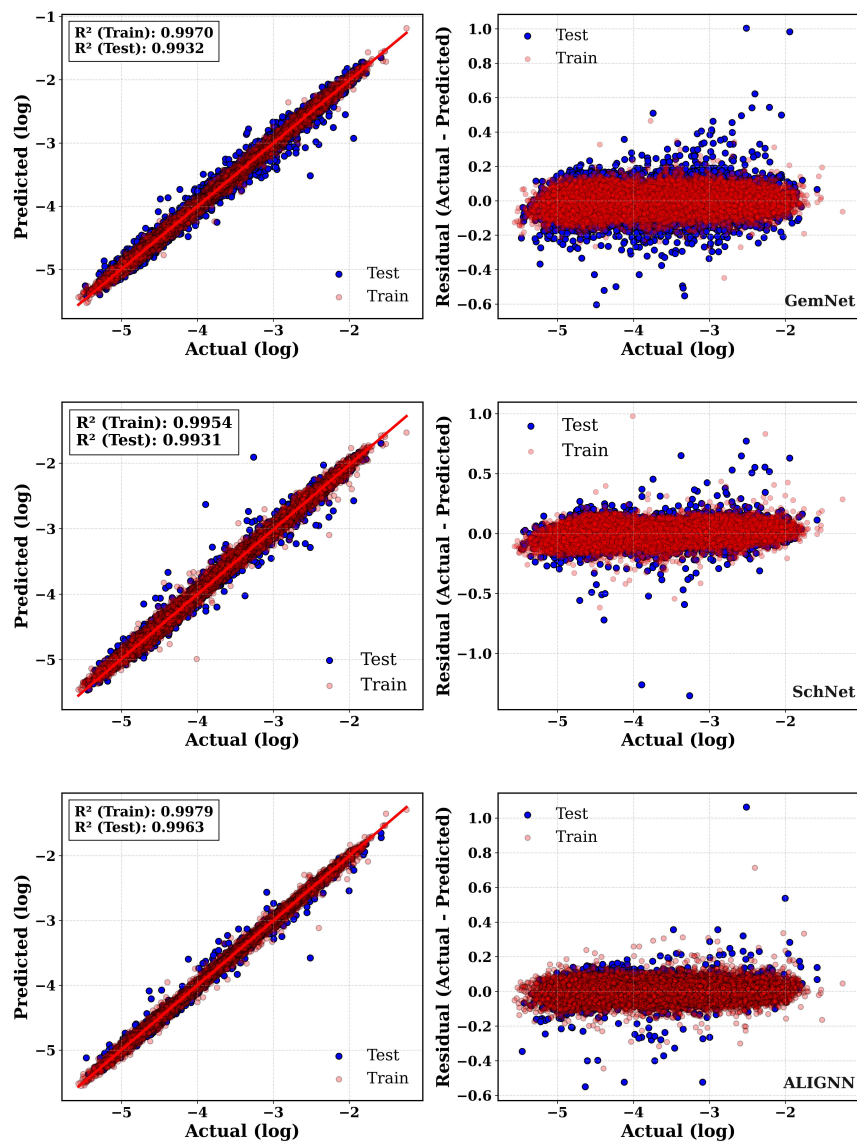

## SECTION S1: EVALUATION METRICS FOR ELECTROPHILICITY INDEX PREDICTION ( $\omega$ )

To assess the performance of regression models in predicting the  $\omega$ , we employ widely used statistical metrics: MAE, MSE, RMSE, and the  $R^2$ . These metrics quantify the discrepancy between predicted and reference values, providing complementary perspectives on model accuracy. The MAE measures the average magnitude of prediction errors, irrespective of their direction, and

is defined as:

$$\text{MAE} = \frac{1}{n} \sum_{i=1}^n |\omega_i - \hat{\omega}_i|, \quad (1)$$

where  $\omega_i$  and  $\hat{\omega}_i$  denote the true and predicted  $\omega$ , respectively, and  $n$  is the total number of molecules. The MSE emphasizes larger deviations by squaring the errors:

$$\text{MSE} = \frac{1}{n} \sum_{i=1}^n (\omega_i - \hat{\omega}_i)^2, \quad (2)$$

while the RMSE provides a measure in the same units as  $\omega$ :

$$\text{RMSE} = \sqrt{\frac{1}{n} \sum_{i=1}^n (\omega_i - \hat{\omega}_i)^2}. \quad (3)$$

The Coefficient of determination,  $R^2$ , evaluates the proportion of variance in the reference data explained by the model:

$$R^2 = 1 - \frac{\sum_{i=1}^n (\omega_i - \hat{\omega}_i)^2}{\sum_{i=1}^n (\omega_i - \bar{\omega})^2}, \quad (4)$$

where  $\bar{\omega}$  is the mean of the true  $\omega$ . Values of  $R^2$  closer to 1 indicate better predictive performance. During model training, these metrics were computed on both the training and validation sets after each epoch, with summary statistics recorded at regular intervals. Final evaluation was performed on the independent test set to ensure robust and unbiased assessment of model predictive capability. Collectively, these metrics provide a comprehensive evaluation of regression accuracy, reliability, and generalization for  $\omega$  prediction.

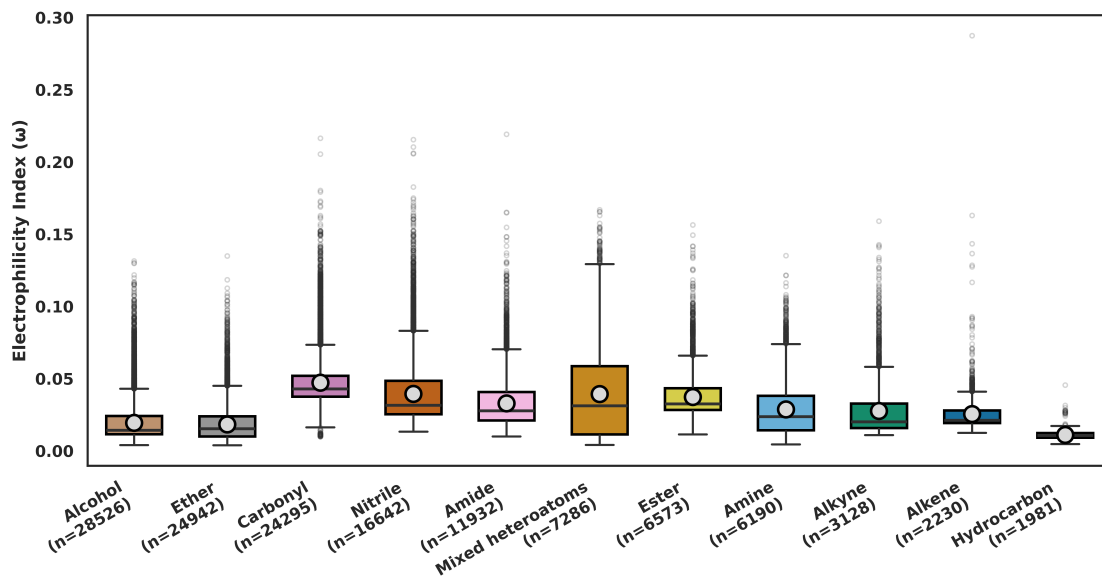

FIG. S6: Distribution of the electrophilicity index ( $\omega$ ) across representative functional groups. Boxes denote the interquartile range (IQR), the central line indicates the median, whiskers show the data range, and outliers are plotted as individual points. White markers represent the mean value for each group.
